# Supplementary material for: T-cell Acute Lymphoblastic Leukemia: A Roadmap to Targeted Therapies
Source: Oxford University Press journal article supplement (doi:10.1158/2643-3230.bcd-20-0093), 2020-11-24
Supplement: 26433230bcd200093-sup-244563_2_supp_6684779_qtx9kw.docx [file 26433230bcd200093-sup-244563_2_supp_6684779_qtx9kw.docx]

**Table S1: relevant clinical trials investigating targeted therapies for T-ALL treatment**

| Therapeutic agent | Target | Association with T-ALL subtype/ outcome | Trial identifier and year posted on clinicaltrials.gov | Tumor type | Phase/status | Results |
| --- | --- | --- | --- | --- | --- | --- |
|
| BH3 mimetics | Higher BCL2 expression | Higher in ETP-ALL |  |  |  |  |
| Venetoclax  (ABT-199) | NCT03236857 (p, ya); 2017 | R/R malignancies | I (R) |  |
|
| NCT03808610 (a); 2019 | R/R ALL (with chemo) | I/II (R) |  |
| Navitoclax  (ABT-263) | Higher BCL2 and BCLXL expression |  | NCT00406809 (a); 2006 | R/R lymphoid malignancies | I/II (C) | Thrombo-cytopenia and neutro-penia (1) |
| NCT03181126 (p, a); 2017 | R/R ALL or LBL (with chemo) | I (A) |  |
| AZD-5991 | Higher MCL1 expression |  | NCT03218683 (a); 2017 | R/R hematologicmalignancies  (also with venetoclax) | I (A) |  |
| NOTCH1 inhibitors | *NOTCH1* activating mutations | Favourable outcome |  |  |  |  |
| Brontictuzumab (OMP-52M51) | NCT01703572 (a); 2012 | R/R lymphoid malignancies | I (C) |  |
| γ-secretase inhibitors |  |  |  |  |
| LY3039478 | NCT02518113 (p, a); 2015 | T-ALL/T-LBL (with dexa) | I/II (C) |  |
| BMS-906024 | NCT01363817 (a); 2011 | R/R T-ALL/LBL (alone or in combination with dexa) | I (C) |  |
| PF-3084014 | NCT00878189 (ya; a); 2009 | R/R T-ALL/LBL and solid tumors | I (C) | Anti T-ALL activity (2) |
| CXCR4 inhibitors |  |  |  |  |  |  |
| Plerixafor (AMD3100) |  |  | NCT01319864 (p, a); 2011 | R/R ALL, AML, and MSD (with cytarabine and etoposide) | I (C) | No response in ALL patients (3) |
| BL-8040 | NCT02763384 (a); 2016 | R/R T-ALL/LBL (with nelarabine) | II (R) |  |
| BET inhibitors | BRD4 activity; aberrant Myc activity |  |  |  |  |  |
| OTX015  (MK-8628) | NCT01713582 (a); 2012 | R/R acute leukemia and MM | I (C) |  |
| GSK525762 | NCT01943851 (a); 2013 | R/R hematologic malignancies | I/II (C) |  |
| ABL/SRC inhibitors | *ABL1* fusions |  |  |  |  |  |
| Dasatinib | NCT03117751 (p); 2017 | Dx ALL/LL (with chemo) | II/III (R) |  |
| Imatinib | NCT02551718 (p, a); 2015 | R/R acute leukemia | N/A (R) |  |
| JAK1/2 inhibitor | *IL7Ra, JAK1/3* and *STAT5B* mutations | Higher in ETP-ALL; associated with steroid resistance |  |  |  |  |
| Ruxolitinib | NCT01251965 (ya, a); 2010 | R/R ALL/AML | I/II (T) | No clinical benefit * |
| NCT03613428 (p, a); 2018 | R/R ETP-ALL (with chemo) | I/II (NR) |  |
| NCT03117751 (p); 2017 | Dx ALL/LL (with chemo) | II/III (R) |  |
| NCT03515200 (p, ya); 2018 | R/R ALL (with chemo) | I (T) |  |
| Pan-PI3K inhibitors |  |  |  |  |  |  |
| Buparlisib (BMK120) | *PIK3R1* and *PIK3CA/D* mutations; *AKT* mutations; *PTEN* deletions; | Poor prognosis, therapy failure and relapse | NCT01396499 (a); 2011 | R/R acute leukemia | I (C) |  |
| NCT01833169 (a); 2013 | PIK3-activated solid and hematologicmalignancies | II (C) |  |
| Selective-PI3K inhibitors |  |  |  |  |
| Duvelisib  (IPI-145, γ/δ inhibitor) | NCT02711852 (a); 2016 | R/R  hematologicmalignancies | II (A) |  |
| Idelalisib  (CAL-101, δ inhibitor) | NCT03742323 (a); 2018 | R/R ALL | I/II (R) |  |
| mTOR inhibitors |  |  |  |  |
| Everolimus (rapamycin, RAD001) | NCT00968253 (p, a); 2009 | R/R ALL (with chemo) | I/II (C) | The combination is tolerated with moderate activity in T-ALL (4) |
| NCT01523977 (p, ya); 2012 | R/R ALL (with chemo) | I (C) | The combination is feasible (5) |
| NCT00874562 (p, a); 2009 | R/R ALL (with steroids) | I (C) |  |
| NCT03740334 (p,a); 2018 | R/R ALL (with dexa and ribociclib) | I (R) |  |
| Temsirolimus (CCI-799) | NCT00084916 (a); 2004 | R/R leukemia | II (C) |  |
| NCT01403415 (p, ya); 2011 | >2 relapses ALL/LBL (with re-induction chemo) | I (C) | Excessive toxicity (6) |
| Dual PI3K/mTOR inhibitors | NCT01756118 (a); 2012 | R/R acute leukemia | I (A) |  |
| Dactolisib  (NVP-BEZ235) |
| AKT inhibitors | NCT01231919 (p, ya); 2010 | R/R solid tumors or leukemia | I (C) |  |
| MK-2206 (allosteric) |
| MEK inhibitors |  |  |  |  |  |  |
| Selumetinib | *NRAS/ KRAS* mutations | Higher in ETP-ALL; associated with steroid resistance | NCT03705507 (p, a); 2018 | R/R ALL (with dexa) | I/II (R) |  |
|
| Trametinib | NCT00920140 (a); 2009 | R/R leukemias | I/II (C) |  |
| NCT02551718 (p, a); 2015 | R/R acute leukemias | N/A (R) |  |
| Binimetinib (MEK162) | NCT01885195 (a); 2013 | RAS/RAF/MEK-activated malignancies | II (C) |  |
| CDK4/6 inhibitors |  |  |  |  |  |  |
| Ribociclib  (LEE011) | *CDKN2A/B* down- regulation; *CDKN1B* deletions; *CCND3* up- regulation | Lower incidence in ETP-ALL | NCT02187783 (a); 2014 | CDK4/6-activated tumors | II (C) |  |
| NCT03740334 (p, a); 2018 | R/R ALL (with dexa and everolimus) | I (R) |  |
| NCT02813135 (p); 2016 | R/R cancer | I/II (R) |  |
| Palbociclib  (PD-332991) | NCT03792256 (p); 2019 | R/R ALL/LL  (with re-induction chemo) | I (R) |  |
| NCT03132454 (ya, a); 2017 | R/R leukemia (with sorafenib, decitabine or dexa) | I (R) |  |
| NCT03515200 (p, ya); 2018 | R/R ALL (with chemo) | I (T) |  |
| Purine analog | Rapid DNA synthesis |  |  |  |  |  |
| Nelarabine | NCT02551718 (p, a); 2015 | R/R acute leukemia | N/A (R) |  |
|
| NCT00866671 (p, ya); 2009 | R/R T-ALL/LBL with ≥2 prior treatments | IV (C) | The risk–benefit profile is positive (7) |
| NCT00408005 (p, ya); 2006 | Dx T-ALL/LBL | III (A) | Increased disease-free survival rate (8) |
| MDM2 inhibitors | MDM2 over- expression |  |  |  |  |  |
| Idasanutlin | NCT04029688 (p, ya); 2019 | R/R acute leukemia or solid tumors (with chemo or venetoclax) | I/II (R) |  |
| HDM201 | NCT02143635 (a); 2014 | p53-WT advanced tumors, including ALL | I (C) |  |
| ALRN-6924 | NCT03654716 (p, ya); 2018 | Pediatric cancer, including R/R ALL | I (R) |  |
| Immunotherapy |  |  |  |  |  |  |
| Daratumumab | CD38 expression |  | NCT00501826 (p, a); 2007 | T-ALL/T-LBL (with chemo) | II (R) |  |
| NCT03384654 (p); 2017 | R/R ALL/LBL (with chemo) | II (R) |  |
| Isatuximab | NCT03860844 (p); 2019 | R/R ALL or AML (with chemo) | II (R) |  |
| CAR T |  |  |  |  |  |  |
| Anti-CD5 CAR T | CD5 expression |  | NCT03081910 (p, a); 2017 | R/R T-cell malignancies | I (R) |  |
| Anti-CD7 CAR T | CD7 expression |  | NCT03690011 (p, a); 2018 | R/R T-cell malignancies | I (NR) |  |
| OTHER DRUGS |  |  |  |  |  |  |
| XPO1 inhibitor | Nuclear export of oncogenic proteins/  mRNA |  |  |  |  |  |
| Selinexor  (KPT-330) | NCT02212561 (p, ya); 2014 | R/R ALL, AML, or MSD | I (C) | Drug is safe with promising activity (9) |
| NCT02091245 (p, ya); 2014 | R/R ALL and AML | I (A) |  |
| HDAC inhibitors | High HDAC expression and activity |  |  |  |  |  |
| Panobinostat | NCT00723203 (a); 2008 | R/R ALL or AML | II (T) | Lack of efficacy * |
| NCT02518750 (p); 2015 | R/R T-ALL/LBL (with bortezomib and chemo) | II (T) | Slow accrual * |
| NCT01321346 (p); 2011 | R/R acute leukemias (with cytarabine) and lymphomas | I (C) |  |
| Vorinostat | NCT03117751 (p); 2017 | Dx ALL/LBL (with chemo) | II/III (R) |  |
| NCT01483690 (p, ya); 2011 | R/R ALL (with decitabine and chemo) | I/II (T) | Excessive toxicity * |
| NCT02553460 (p); 2015 | Dx ALL (with bortezomib and chemo) | I/II (R) |  |
| Methyltransferase inhibitors | DNA methyl-transferase activity |  |  |  |  |  |
| 5-Azacitidine | NCT02551718 (p,a); 2015 | R/R acute leukemias | N/A (R) |  |
| NCT01861002 (p); 2013 | R/R ALL or AML (with chemo) | I (C) |  |
| Decitabine | NCT02551718 (p, a); 2015 | R/R acute leukemias | N/A (R) |  |
| NCT01483690 (p, ya); 2011 | R/R ALL (with vorinostat and chemo) | I/II (T) | Excessive toxicity * |
| NCT00349596 (p, a); 2006 | R/R ALL | I (C) |  |
| NCT03132454 (ya, a); 2017 | R/R ALL or AML (with palbociclib) | I (R) |  |
| Proteasome inhibitors |  |  |  |  |  |  |
| Bortezomib | Rapid protein turnover |  | NCT02518750 (p); 2015 | R/R T-ALL/LBL (with chemo) | II (T) | Slow accrual * |
| NCT02553460 (p); 2015 | Dx ALL (with vorinostar and chemo) | I/II (R) |  |
| NCT02551718 (p, a); 2015 | R/R acute leukemias | N/A (R) |  |
| NCT00440726 (p); 2007 | R/R ALL (with chemo) | I/II (C) |  |
| NCT04224571 (p, ya); 2020 | R/R ALL (with chemo) | II (R) |  |
| NCT00873093 (p, a); 2009 | 1st relapse ALL/LBL (with chemo) | II (C) | Promising results for T-ALL (10) |
| NCT02112916 (p, ya); 2014 | Dx T-ALL-LBL (with chemo) | III (A) |  |
| NCT03590171 (p); 2018 | R ALL (with chemo) | II (R) |  |
| NCT03117751 (p); 2017 | Dx ALL/LBL (with chemo) | II/III (R) |  |
| NCT03643276 (p); 2018 | Dx ALL (with chemo) | III (R) |  |
| NAE inhibitor |  |  |  |  |
| Pevonedistat (MLN49243) | NCT03349281 (ya, a); 2017 | R/R ALL (with chemo) | I (R) |  |
| AURK inhibitors | AURK over expression |  |  |  |  |  |
| Alisertib | NCT01154816 (p, ya); 2010 | R/R ALL, AML, and solid tumors | II (C) | Response rate <5%  (11) |
| AT-9283 | NCT01431664 (p); 2011 | R/R acute leukemia | I (C) | No efficacy (12) |

List of clinical trials investigating the targeted agents described in this review. The clinical trials listed were chosen based on the following two selection criteria: the targeted drug investigated belongs to one of the categories of agents described in the text (modifiers of apoptosis, inhibitors of transcription regulation, signal transduction, cell cycle or immunotherapies) and the trial includes T-ALL patients.

* Source: <https://clinicaltrials.gov/>

Abbreviations: p= pediatric, ya= young adult, a= adults; ALL= acute lymphoblastic leukemia, LBL= lymphoblastic lymphoma, AML= acute myeloid leukemia, MDS= myelodysplastic syndrome, MM= multiple myeloma, Dx= newly diagnosed, R/R= refractory/relapsed; chemo= chemotherapy; dexa= dexamethasone; WT= wild-type; N/A= not applicable, R= recruiting, A= active, C= completed, T= terminated, NR= not yet recruiting.

**References**

1. Wilson WH, O'Connor OA, Czuczman MS, LaCasce AS, Gerecitano JF, Leonard JP*, et al.* Navitoclax, a targeted high-affinity inhibitor of BCL-2, in lymphoid malignancies: a phase 1 dose-escalation study of safety, pharmacokinetics, pharmacodynamics, and antitumour activity. Lancet Oncol **2010**;11(12):1149-59 doi 10.1016/S1470-2045(10)70261-8.

2. Papayannidis C, DeAngelo DJ, Stock W, Huang B, Shaik MN, Cesari R*, et al.* A Phase 1 study of the novel gamma-secretase inhibitor PF-03084014 in patients with T-cell acute lymphoblastic leukemia and T-cell lymphoblastic lymphoma. Blood Cancer J **2015**;5:e350 doi 10.1038/bcj.2015.80.

3. Cooper TM, Sison EAR, Baker SD, Li L, Ahmed A, Trippett T*, et al.* A phase 1 study of the CXCR4 antagonist plerixafor in combination with high-dose cytarabine and etoposide in children with relapsed or refractory acute leukemias or myelodysplastic syndrome: A Pediatric Oncology Experimental Therapeutics Investigators' Consortium study (POE 10-03). Pediatr Blood Cancer **2017**;64(8) doi 10.1002/pbc.26414.

4. Daver N, Boumber Y, Kantarjian H, Ravandi F, Cortes J, Rytting ME*, et al.* A Phase I/II Study of the mTOR Inhibitor Everolimus in Combination with HyperCVAD Chemotherapy in Patients with Relapsed/Refractory Acute Lymphoblastic Leukemia. Clin Cancer Res **2015**;21(12):2704-14 doi 10.1158/1078-0432.CCR-14-2888.

5. Place AE, Pikman Y, Stevenson KE, Harris MH, Pauly M, Sulis ML*, et al.* Phase I trial of the mTOR inhibitor everolimus in combination with multi-agent chemotherapy in relapsed childhood acute lymphoblastic leukemia. Pediatr Blood Cancer **2018**;65(7):e27062 doi 10.1002/pbc.27062.

6. Rheingold SR, Tasian SK, Whitlock JA, Teachey DT, Borowitz MJ, Liu X*, et al.* A phase 1 trial of temsirolimus and intensive re-induction chemotherapy for 2nd or greater relapse of acute lymphoblastic leukaemia: a Children's Oncology Group study (ADVL1114). Br J Haematol **2017**;177(3):467-74 doi 10.1111/bjh.14569.

7. Zwaan CM, Kowalczyk J, Schmitt C, Bielorai B, Russo MW, Woessner M*, et al.* Safety and efficacy of nelarabine in children and young adults with relapsed or refractory T-lineage acute lymphoblastic leukaemia or T-lineage lymphoblastic lymphoma: results of a phase 4 study. Br J Haematol **2017**;179(2):284-93 doi 10.1111/bjh.14874.

8. Dunsmore KP, Winter SS, Devidas M, Wood BL, Esiashvili N, Chen Z*, et al.* Children's Oncology Group AALL0434: A Phase III Randomized Clinical Trial Testing Nelarabine in Newly Diagnosed T-Cell Acute Lymphoblastic Leukemia. J Clin Oncol **2020**;38(28):3282-93 doi 10.1200/JCO.20.00256.

9. Alexander TB, Lacayo NJ, Choi JK, Ribeiro RC, Pui CH, Rubnitz JE. Phase I Study of Selinexor, a Selective Inhibitor of Nuclear Export, in Combination With Fludarabine and Cytarabine, in Pediatric Relapsed or Refractory Acute Leukemia. J Clin Oncol **2016**;34(34):4094-101 doi 10.1200/JCO.2016.67.5066.

10. Horton TM, Whitlock JA, Lu X, O'Brien MM, Borowitz MJ, Devidas M*, et al.* Bortezomib reinduction chemotherapy in high-risk ALL in first relapse: a report from the Children's Oncology Group. Br J Haematol **2019**;186(2):274-85 doi 10.1111/bjh.15919.

11. Mosse YP, Fox E, Teachey DT, Reid JM, Safgren SL, Carol H*, et al.* A Phase II Study of Alisertib in Children with Recurrent/Refractory Solid Tumors or Leukemia: Children's Oncology Group Phase I and Pilot Consortium (ADVL0921). Clin Cancer Res **2019**;25(11):3229-38 doi 10.1158/1078-0432.CCR-18-2675.

12. Vormoor B, Veal GJ, Griffin MJ, Boddy AV, Irving J, Minto L*, et al.* A phase I/II trial of AT9283, a selective inhibitor of aurora kinase in children with relapsed or refractory acute leukemia: challenges to run early phase clinical trials for children with leukemia. Pediatr Blood Cancer **2017**;64(6) doi 10.1002/pbc.26351.
